# Supplementary material for: On the Size of the Gender Difference in Competitiveness
Source: Atypon-hosted journal article supplement (doi:10.1287/mnsc.2016.2673), 2017-05-01
Supplement: mnsc.2016.2673-sm-data.zip [file Sample size.pdf › Sample size.pdf]

Sample sizes for the experiment were determined considering the effect sizes and samples used in similar paradigms (e.g., Niederle and Vesterlund, 2007). We then collected additional data as a result of revisions of the paper by request of reviewers. All data are reported in the paper. We measured individuals' choices we asked to make a binary decision between a tournament or a piece rate scheme, and when asked to how to allocate 100 points to a tournament or a piece option. The additional measures collected are expected performance, self-reported confidence of winning, self-reported tendency to take risks, an incentivized risk aversion measure via a multiple price list, an incentivized ambiguity measure via a multiple price list, subjects' performance on the task, gender composition of the experimental session, and demographic variables. The additional measures were not collected for the Fall 2013 sessions. Subject's performance on the task is missing for one session (N=6).
